# Supplementary material for: Moving Towards Decolonizing Health Professions Education Research: An Analysis of Global Network Patterns and Equity Implications
Source: Research Square preprint supplement (doi:10.21203/rs.3.rs-8152649/v1), 2026-01-27
Supplement: Supplementary file 1 [file 0b5c8ba08228fba4f275032f.docx]

**Table S1** Network parameters used in this study.

| **Parameter** | **Definition** | **Interpretation** |
| --- | --- | --- |
| **Number of nodes (N)** | Total number of distinct countries included in the co-authorship network. | A higher number indicates broader global participation in medical education research. |
| **Number of edges (E)** | Total number of unique co-authorship links between countries. | An increasing number reflects growth in international collaboration. |
| **Network density** | Proportion of actual links relative to all possible links among countries. | Higher density suggests a more interconnected global research network. |
| **Modularity (Q)** | The degree to which the network is divided into distinct clusters or communities. | Higher modularity implies segregated clusters; lower values suggest greater integration. |
| **Small–world coefficient** | Measure comparing clustering and path length against a random network. | Higher values indicate a balanced structure with both local and global integration. |
| **Homophily** | Tendency of countries to collaborate with others of similar income or region. | A positive value indicates within-group preference; declining values suggest increased inclusivity. |
| **Degree centrality (D)** | Number of direct co-authorship links a country maintains. | A higher degree suggests the country functions as a major collaboration hub. |
| **Closeness centrality (C)** | Inverse of the average shortest distance from one country to all others. | Countries with high closeness can interact more efficiently across the network. |
| **Betweenness centrality (B)** | Frequency with which a country appears on the shortest paths between other country pairs. | A higher value indicates the country’s role as a key intermediary or broker. |
| **Participation coefficient (P)** | Extent to which a country’s collaborations span across multiple network communities. | A high coefficient denotes integrative roles; a low value suggests insular collaboration. |
